# Supplementary material for: Fingolimod Alters Tissue Distribution and Cytokine Production of Human and Murine Innate Lymphoid Cells
Source: PubMed Central journal article supplement (PMC6385997; doi:10.3389/fimmu.2019.00217), 2019-02-13
Supplement: Data_Sheet_1.pdf [file Data_Sheet_1.pdf]

A

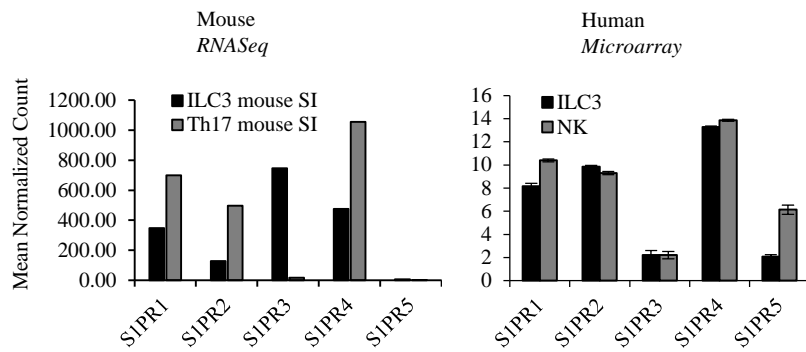

B

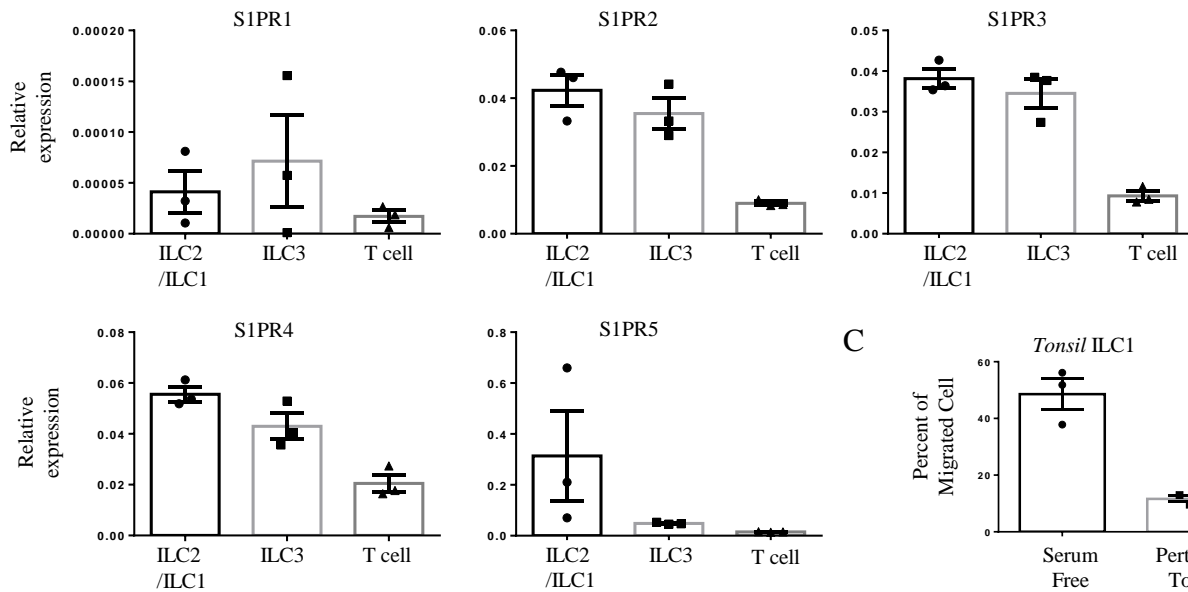

C

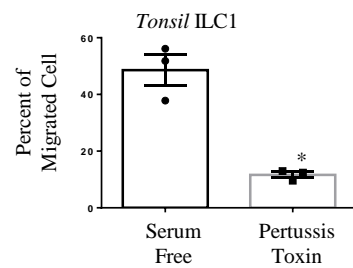

D

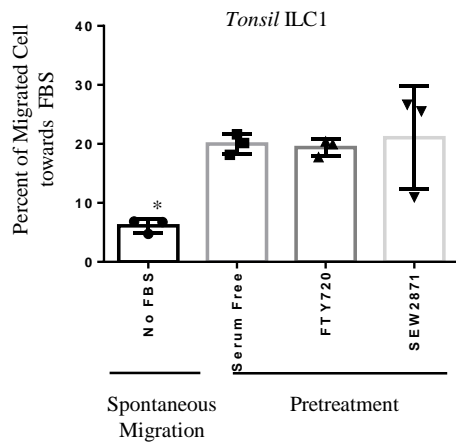

E

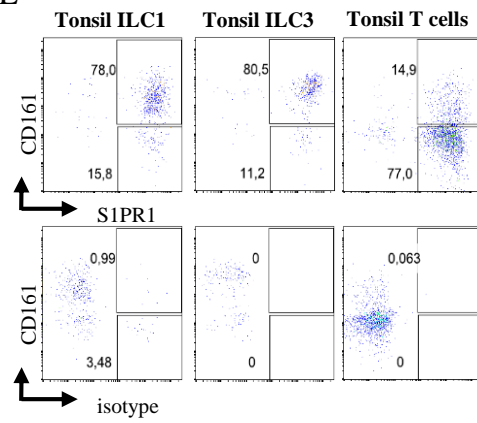

A

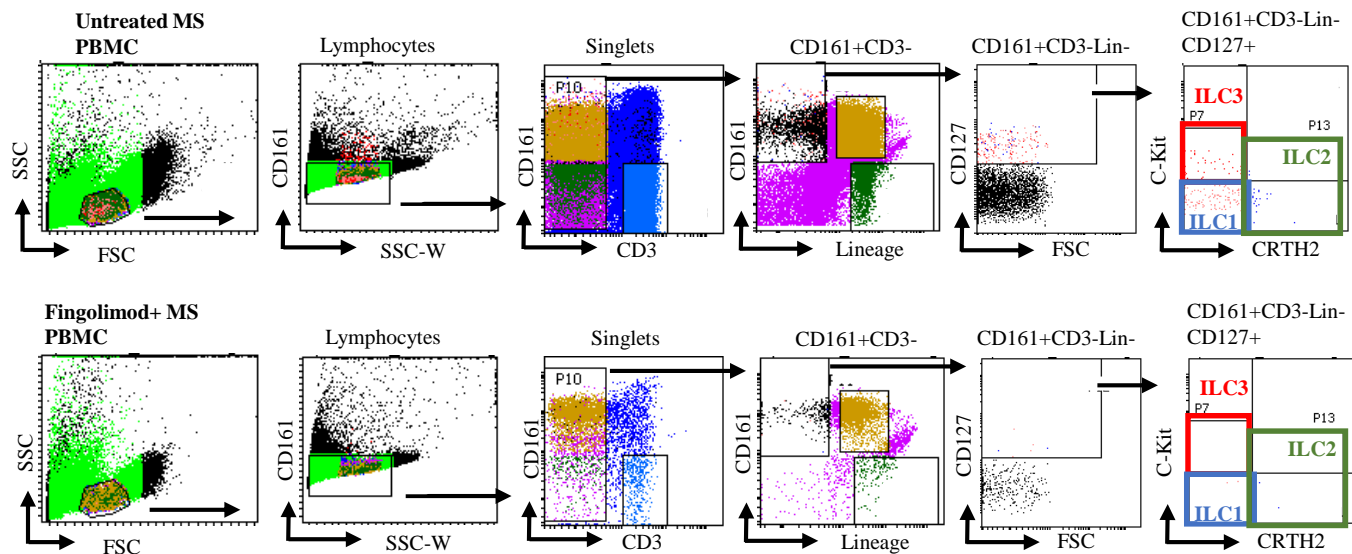

B

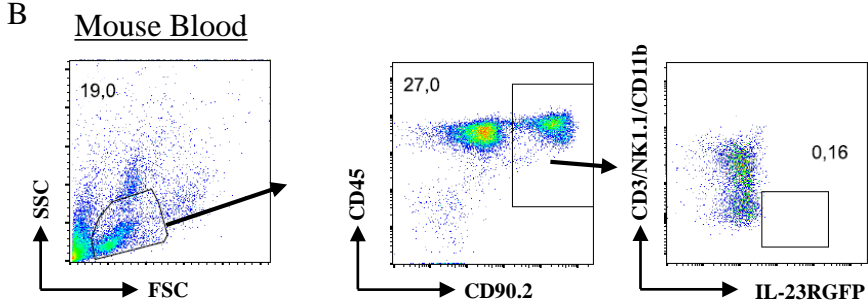

A

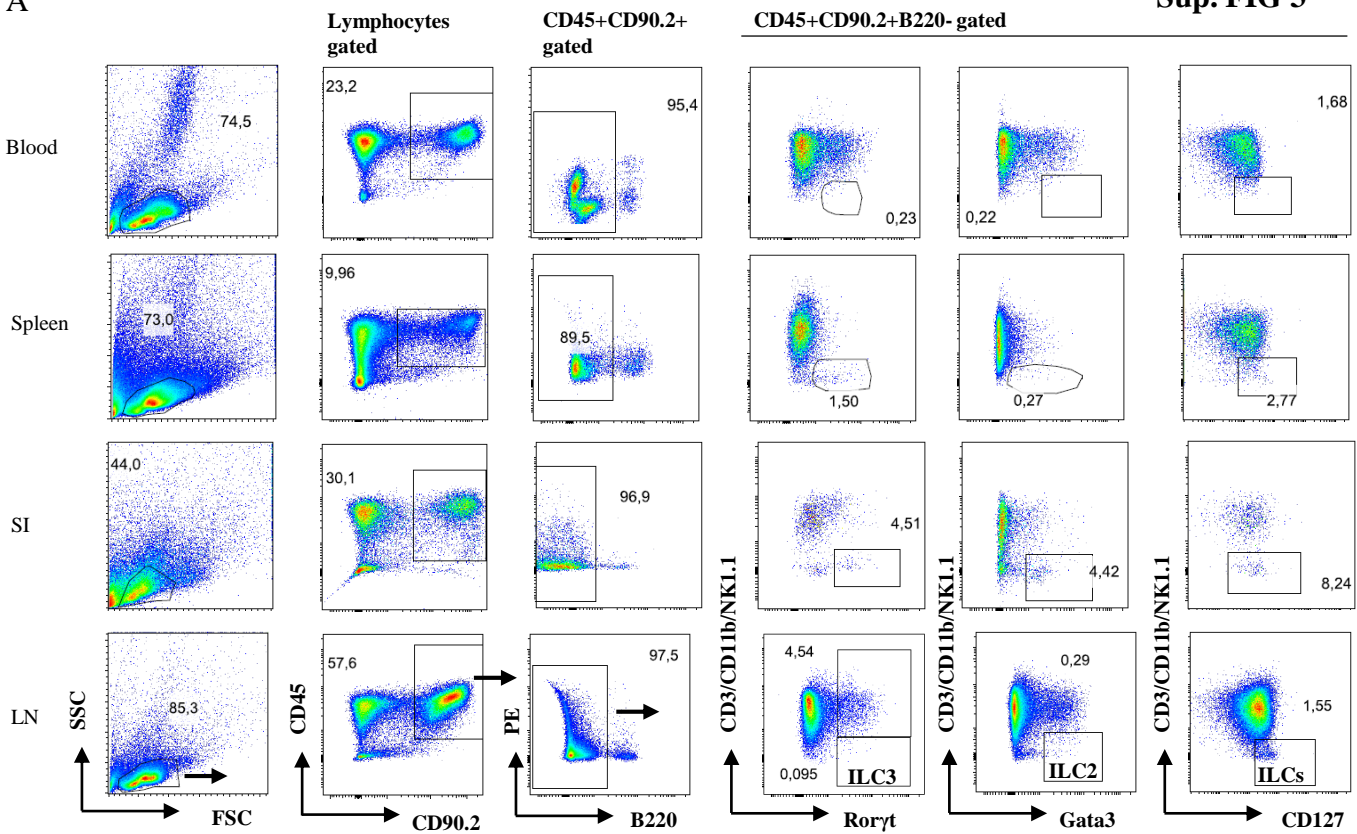

B

Small Intestine

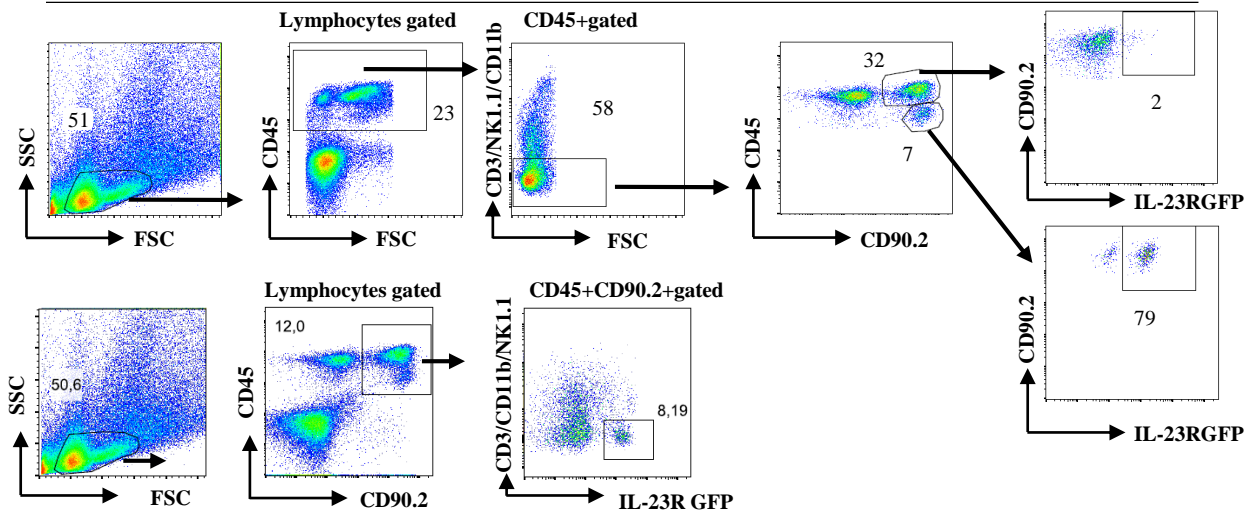

C

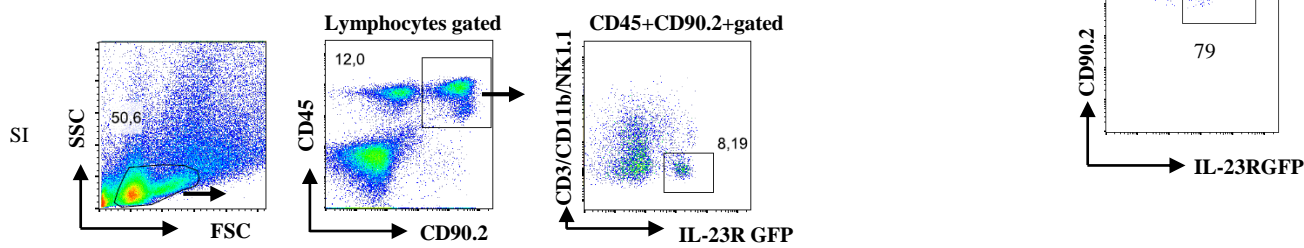

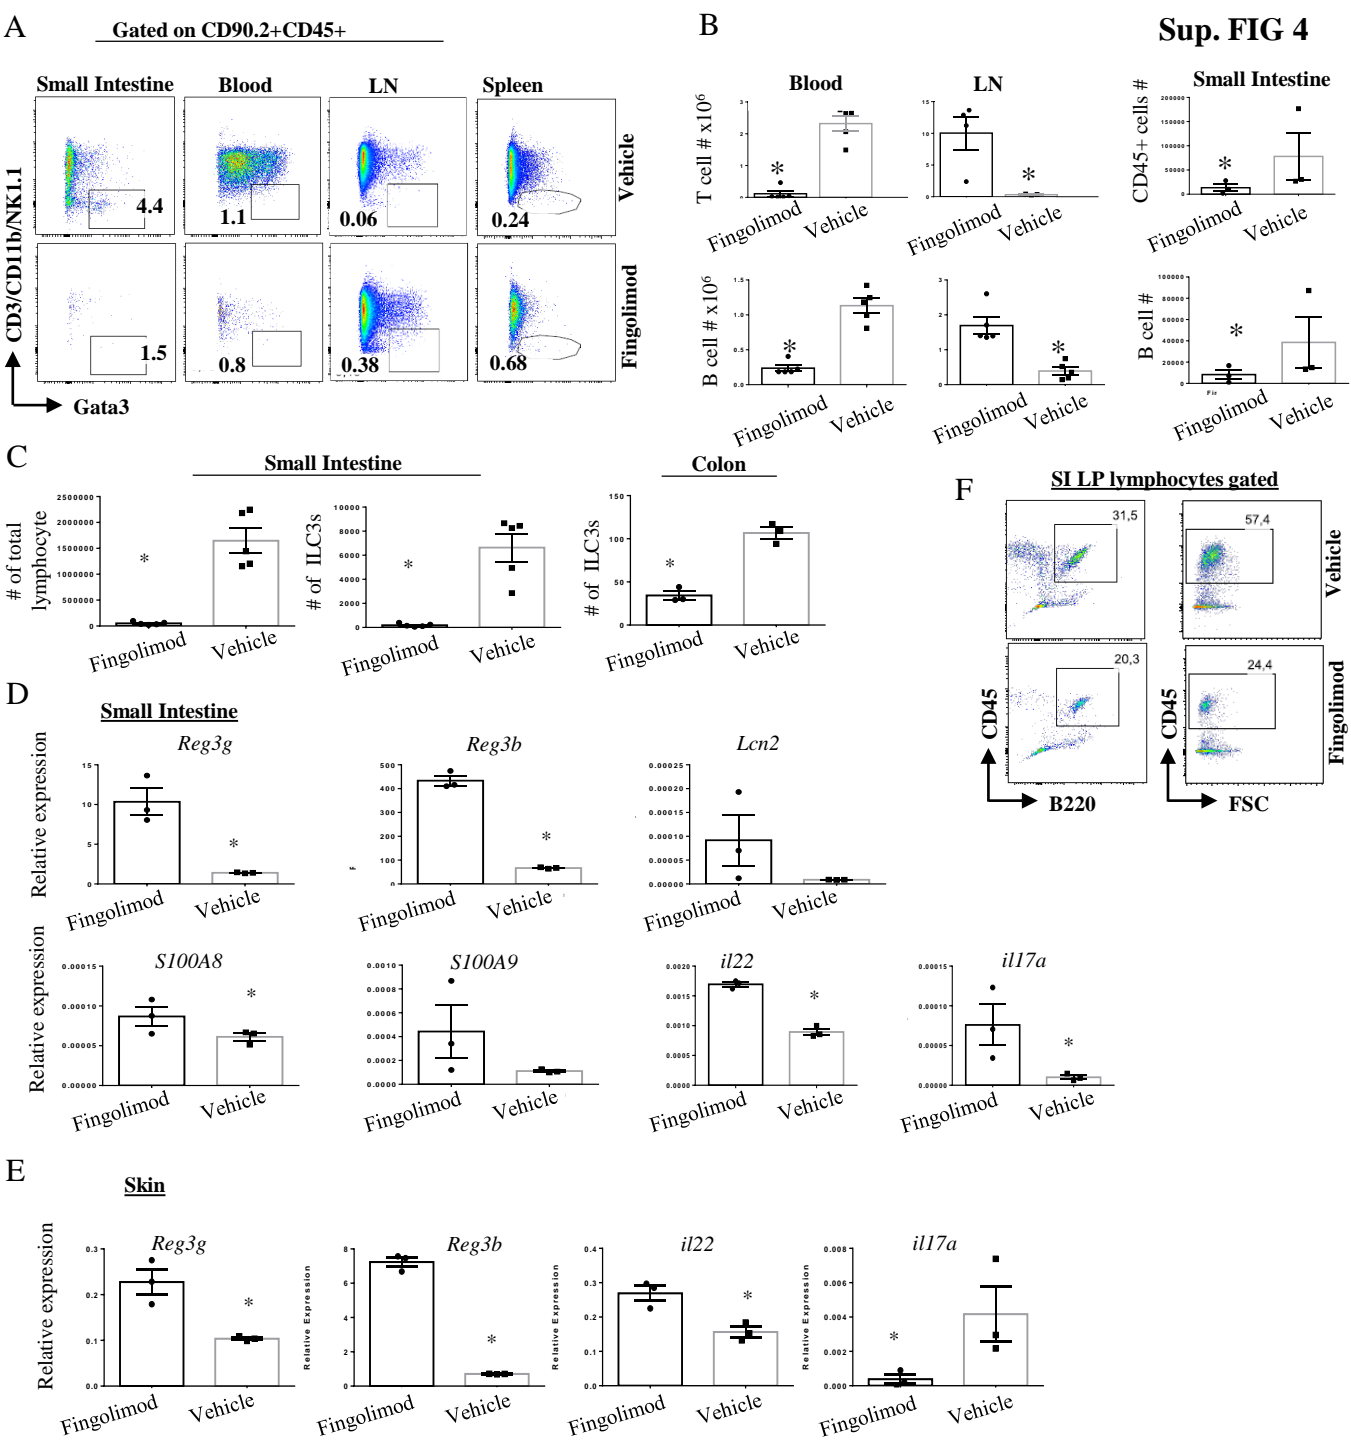

Sorted human tonsil ILC3 (CD3<sup>-</sup>Lin<sup>-</sup>CD161<sup>+</sup>CD127<sup>+</sup>cKit<sup>+</sup>CRTH2<sup>+</sup>)

+ IL-12/IL-23/IL-1B/IL-7

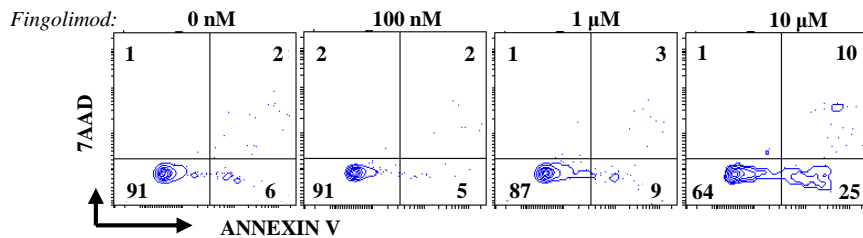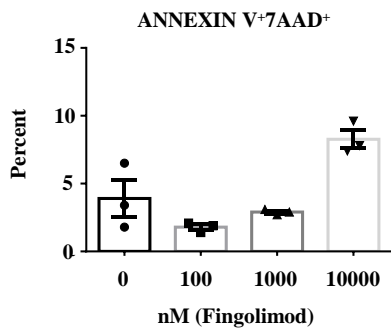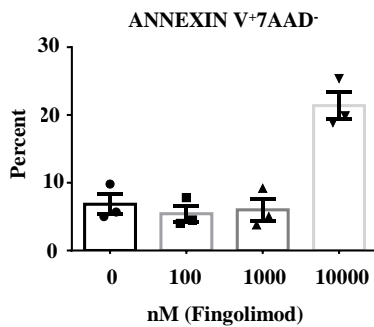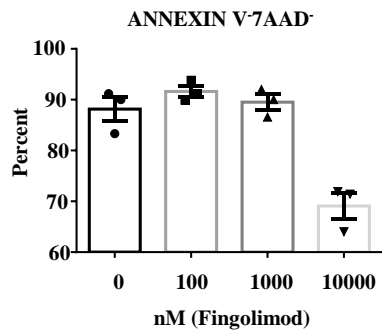

| Gene Name                          | Primer Sequence           | Reference |
|------------------------------------|---------------------------|-----------|
| <i>hS1PR1_FW</i>                   | GCTCTCCGAACGCAACTTC       | [1]       |
| <i>hS1PR1_RV</i>                   | GGTGGTTCGATGAGTGATCC      |           |
| <i>hS1PR2_FW</i>                   | CAAGTTCCTACTCGGCAATGT     | [2]       |
| <i>hS1PR2_RV</i>                   | CAGGAGGCTGAAACAGAGG       |           |
| <i>hS1PR3_FW</i>                   | TCAGGGAGGGCAGTATGTTC      | [2]       |
| <i>hS1PR3_RV</i>                   | GAGTAGAGGGGCAGGATGGT      |           |
| <i>hS1PR4_FW</i>                   | GTCTTTGGCTCCAACCTCTG      | [3]       |
| <i>hS1PR4_RV</i>                   | CGGAAGGAGTAGATGATGGG      |           |
| <i>hS1PR5_FW</i>                   | GGCGCGCACCTGTCCTGTAC      |           |
| <i>hS1PR5_RV</i>                   | TCGGGTCTCTGCCGCAGGAG      |           |
| <i>mS1PR1_FW</i>                   | GGAGGTTAAAGCTCTCCGC       |           |
| <i>mS1PR1_RV</i>                   | CGCCCCGATCTTCAAC          |           |
| <i>mS1PR2_FW</i>                   | GCGTGGTCACCATCTTCTCC      | [4]       |
| <i>mS1PR2_RV</i>                   | CGTCTGAGGACCAGCAACATC     |           |
| <i>mS1PR3_FW</i>                   | CATCGCCTTCCTCATCAGTATCTTC | [4]       |
| <i>mS1PR3_RV</i>                   | CACAATCACTACGGTCCGCA      |           |
| <i>mS1PR4_FW</i>                   | CCACAGCCTCCTCATTGTC       | [4]       |
| <i>mS1PR4_RV</i>                   | TCAGCATCCCTAGCCCTC        |           |
| <i>mS1PR5_FW</i>                   | ACTGCTTAGGACGCCTGGAA      | [4]       |
| <i>mS1PR5_RV</i>                   | CCGCACCTGACAGTAAATCCTT    |           |
| <i>mIFN<math>\gamma</math>_FW</i>  | TCAAGTGGCATAGATGTGGAAGAA  |           |
| <i>mIFN<math>\gamma</math>_RV</i>  | TGGCTCTGCAGGATTTTCATG     |           |
| <i>mLcn2_FW</i>                    | GGCCCTGAGTGTCTATGTGTC     |           |
| <i>mLcn2_RV</i>                    | TTCTGATCCAGTAGCGACAGC     |           |
| <i>mReg3<math>\gamma</math>_FW</i> | CCGTGCCTATGGCTCCTATTG     |           |
| <i>mReg3<math>\gamma</math>_RV</i> | GCACAGACACAAGATGTCCTG     |           |
| <i>mReg3B_FW</i>                   | TACTGCCTTAGACCGTGCTTTCTG  |           |
| <i>mReg3B_RV</i>                   | GACATAGGGCAACTTCACCTCACA  |           |
| <i>mS100a8_FW</i>                  | TGCGATGGTGATAAAAAGTGG     |           |
| <i>mS100a8_RV</i>                  | GGCCAGAAGCTCTGCTACTC      |           |
| <i>mS100a9_FW</i>                  | CACAGTTGGCAACCTTTATG      |           |
| <i>mS100a9_RV</i>                  | CAGCTGATTGTCCTGGTTTG      |           |

|                     | <i>Fingolimod+ (MS Patient)</i> |        | <i>Untreated (MS Patient)</i> |        |
|---------------------|---------------------------------|--------|-------------------------------|--------|
|                     | Male                            | Female | Male                          | Female |
| <i>Patients (n)</i> | 4                               | 10     | 4                             | 7      |
| <i>Mean Age</i>     | 46.5                            | 41.33  | 30.25                         | 32.83  |

## Supplementary References

1. Sic, H., Kraus, H., Madl, J., Flittner, K.-A., Lilly Von M€ Unchow, A., Pieper, K., ... Eibel, H. (2014). Sphingosine-1-phosphate receptors control B-cell migration through signaling components associated with primary immunodeficiencies, chronic lymphocytic leukemia, and multiple sclerosis. *Journal of Allergy and Clinical Immunology*, 134, 420–428.e15. <https://doi.org/10.1016/j.jaci.2014.01.037>
2. Gu, Y., Frostyan, T., Sabbadini, R., & Rosenblatt, J. (2011). Epithelial cell extrusion requires the sphingosine-1-phosphate receptor 2 pathway. *Journal of Cell Biology*, 193(4), 667–676. <https://doi.org/10.1083/jcb.201010075>
3. He, X., H'ng, S.-C., Leong, D. T., Hutmacher, D. W., & Melendez, A. J. (2010). Sphingosine-1-Phosphate Mediates Proliferation Maintaining the Multipotency of Human Adult Bone Marrow and Adipose Tissue-derived Stem Cells. *Journal of Molecular Cell Biology*, 2(4), 199–208. <https://doi.org/10.1093/jmcb/mjq011>
4. Orr Gandy, K., Canals, D., Adada, M., Wada, M., Roddy, P., Snider, A., ... Obeid, L. (2012). Sphingosine 1-Phosphate induces filopodia formation through S1P2R activation of ERM proteins. *Biochemical Journal*, 672, 661–672. <https://doi.org/10.1042/BJ20120213>
